# Supplementary material for: Adolescent Sexual Behavior Patterns in a British Birth Cohort: A Latent Class Analysis
Source: PubMed Central journal article supplement (PMC7878235; doi:10.1007/s10508-019-01578-w), 2020-01-06
Supplement: 10508_2019_1578_MOESM1_ESM.pdf [file 10508_2019_1578_MOESM1_ESM.pdf]

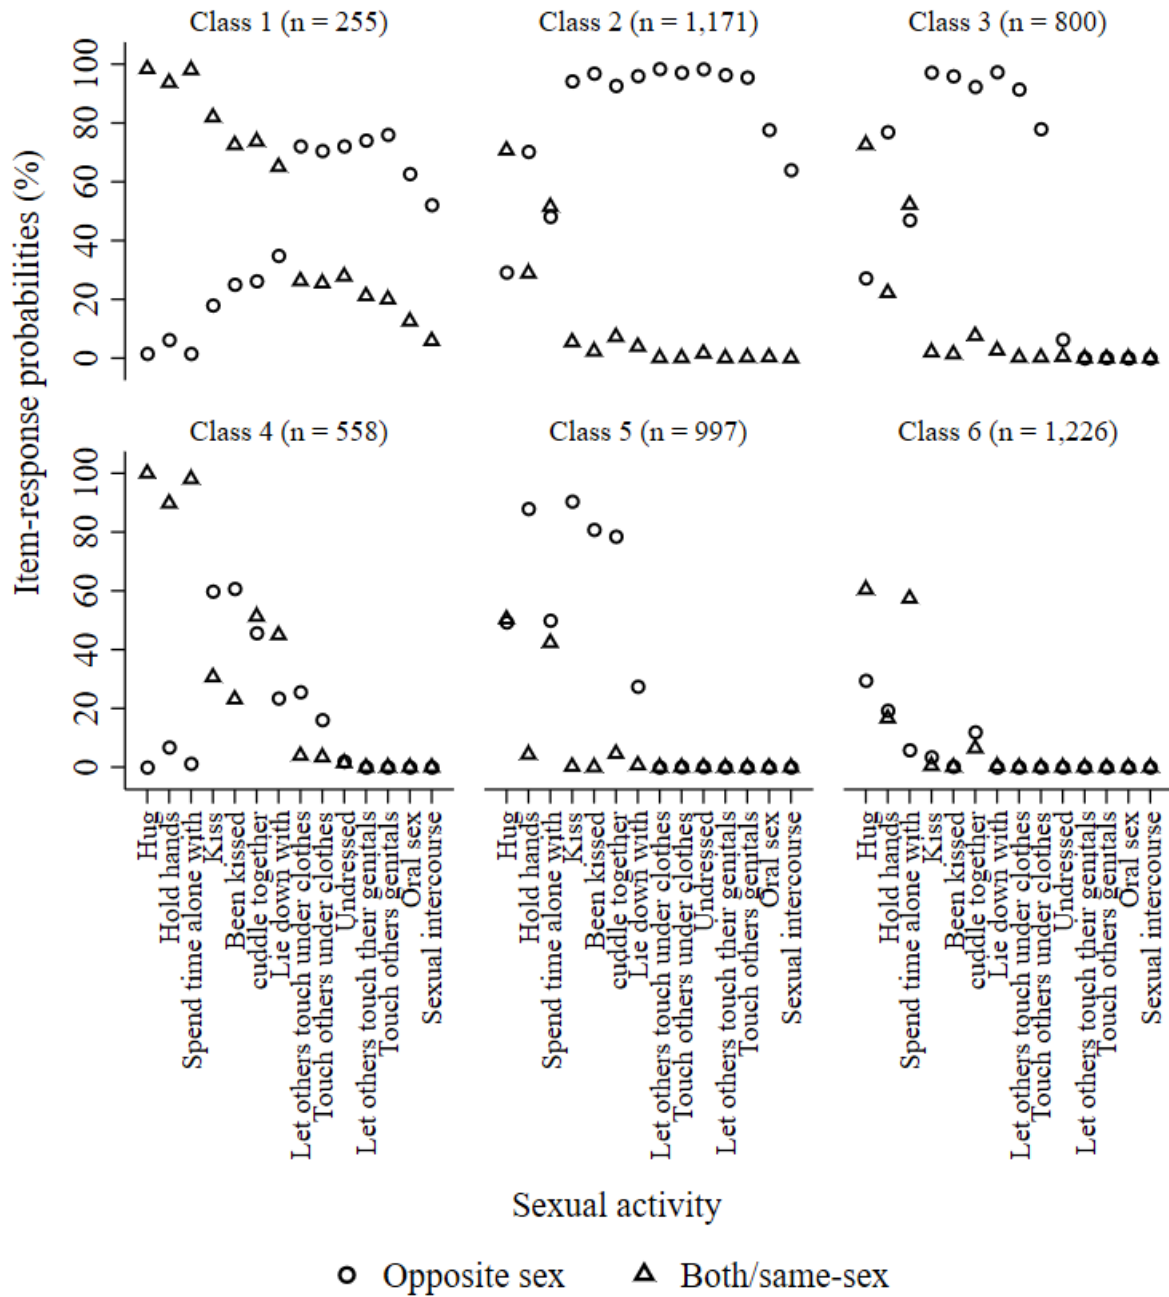

Supplemental Figure 1. Item-response probabilities for six class models of adolescent sexual behavior

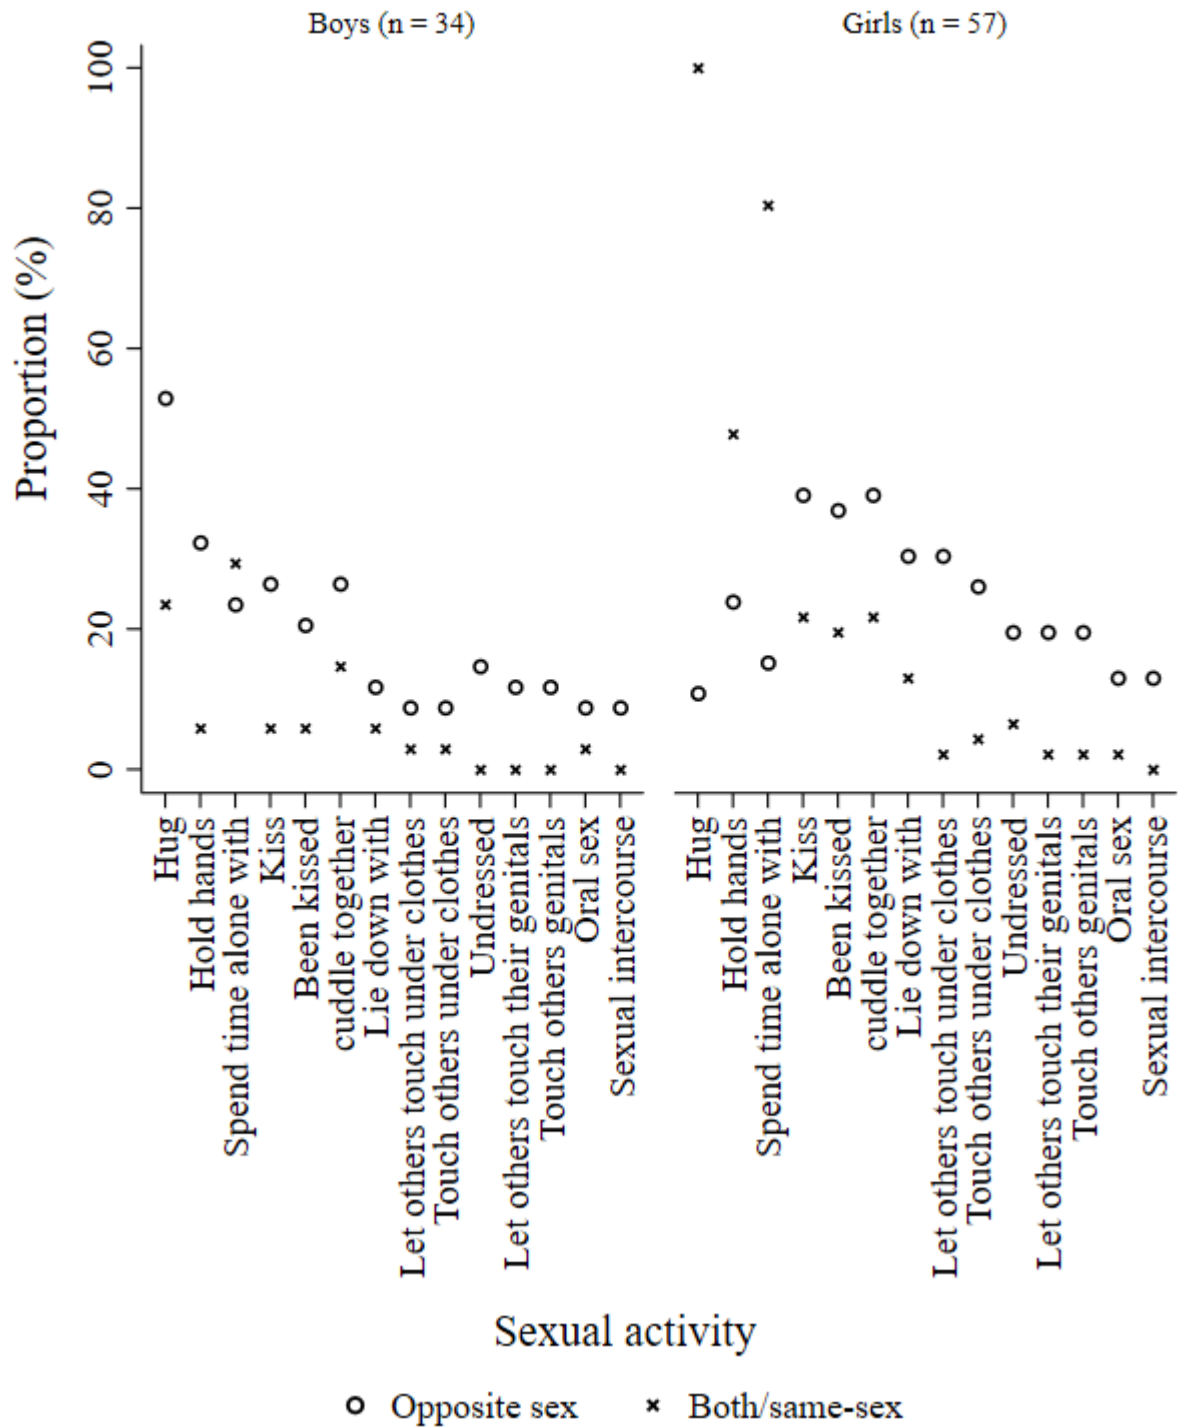

Supplemental Figure 2. Adolescents sexual behavior for “not sure” stratified by sex
